1 Title:

2 **VMHdm/c<sup>SF-1</sup> Neuronal Circuits Regulate Skeletal Muscle PGC1- $\alpha$  via the Sympathoadrenal**

3 **Drive**

4

5 Author:

6 Takuya Yoshida<sup>1,2\*</sup>, Scotlynn Farmer<sup>1</sup>, Ami Harada<sup>1,3</sup>, Zhen Shi<sup>1,4</sup>, Jenny J. Lee<sup>5</sup>, Arely Tinajero<sup>5</sup>,

7 Ashish K. Singha<sup>1</sup>, Teppei Fujikawa<sup>1,5#</sup>

8

9 Affiliation:

10 1. Department of Cellular and Integrative Physiology, Long School of Medicine, University of

11 Texas Health San Antonio, San Antonio, US

12 2. Department of Clinical Nutrition School of Food and Nutritional Sciences, University of

13 Shizuoka, Shizuoka, Japan

14 3. Nara Medical University, Nara, Japan

15 4. Department of Plastic Surgery, Hospital Zhejiang University School of Medicine, Zhejiang,

16 China

17 5. Center for Hypothalamic Research, Department of Internal Medicine, UT Southwestern Medical

18 Center, Dallas, US

19

20 \*Current Address: Laboratory of Clinical Nutrition, Division of Food and Health Environmental

21 Sciences, Prefectural University of Kumamoto, Kumamoto, Japan

22

23 # Corresponding Author: Teppei Fujikawa email: [tepei.fujikawa@utsouthwestern.edu](mailto:tepei.fujikawa@utsouthwestern.edu)

24 **Abstract**

25 To adapt to metabolically challenging environments, the central nervous system (CNS)  
26 orchestrates metabolism of peripheral organs including skeletal muscle. The organ-communication  
27 between the CNS and skeletal muscle has been investigated, yet our understanding of the neuronal  
28 pathway from the CNS to skeletal muscle is still limited. Neurons in the dorsomedial and central  
29 parts of the ventromedial hypothalamic nucleus (VMHdm/c) expressing steroidogenic factor-1  
30 (VMHdm/c<sup>SF-1</sup> neurons) are key for metabolic adaptations to exercise, including increased basal  
31 metabolic rate and skeletal muscle mass in mice. However, the mechanisms by which  
32 VMHdm/c<sup>SF-1</sup> neurons regulate skeletal muscle function remain unclear. Here, we show that  
33 VMHdm/c<sup>SF-1</sup> neurons increase the sympathoadrenal activity and regulate skeletal muscle  
34 peroxisome proliferator-activated receptor gamma coactivator 1 alpha (PGC-1 $\alpha$ ) in mice via  
35 multiple downstream nodes. Optogenetic activation of VMHdm/c<sup>SF-1</sup> neurons dramatically  
36 elevates mRNA levels of skeletal muscle *Pgc-1 $\alpha$* , which regulates a spectrum of skeletal muscle  
37 function including protein synthesis and metabolism. Mechanistically, the sympathoadrenal drive  
38 coupled with  $\beta$ 2 adrenergic receptor ( $\beta$ 2AdR) is essential for VMHdm/c<sup>SF-1</sup> neurons-mediated  
39 increases in skeletal muscle PGC1- $\alpha$ . Specifically, adrenalectomy and knockout of  $\beta$ 2AdR block  
40 augmented skeletal muscle PGC1- $\alpha$  by VMHdm/c<sup>SF-1</sup> neuronal activation. Optogenetic functional  
41 mapping reveals that downstream nodes of VMHdm/c<sup>SF-1</sup> neurons are functionally redundant to  
42 increase circulating epinephrine and skeletal muscle PGC1- $\alpha$ . Collectively, we propose that  
43 VMHdm/c<sup>SF-1</sup> neurons-skeletal muscle pathway, VMHdm/c<sup>SF-1</sup> neurons→multiple downstream  
44 nodes→the adrenal gland→skeletal muscle  $\beta$ 2AdR, underlies augmented skeletal muscle function  
45 for metabolic adaptations.

## 46 Introduction

47 The central nervous system (CNS) orchestrates the whole-body metabolism<sup>1,2</sup>. Within the  
48 CNS, the hypothalamus plays a dominant role in the regulation of metabolic homeostasis in  
49 response to dynamic challenges such as hypoglycemia<sup>3</sup>, cold-exposure<sup>4</sup>, and exercise<sup>5</sup>. Our  
50 previous work articulates that neurons in the dorsomedial and central parts of ventromedial  
51 hypothalamic nucleus (VMHdm/c neurons) substantially contribute to metabolic adaptations to  
52 exercise training including augmented skeletal muscle mass and basal metabolic rate in mice<sup>6</sup>.  
53 Knockdown of steroidogenic factor-1 (SF-1)<sup>7,8</sup> in VMHdm/c neurons hampers exercise-induced  
54 mRNA expression of *peroxisome proliferator-activated receptor gamma coactivator 1 alpha*  
55 (*Pgc-1α*) in skeletal muscle<sup>6</sup>. PGC-1α is a key transcriptional regulator that controls a broad range  
56 of genes related to glucose and fat metabolism, mitochondrial function, angiogenesis, and protein  
57 synthesis<sup>9,10</sup>. Loss- or gain-of-function of PGC-1α in skeletal muscle dramatically changes skeletal  
58 muscle physiology as well as whole-body metabolism<sup>11,12</sup>. These data suggest that VMHdm/c  
59 neurons expressing SF-1 (VMHdm/c<sup>SF-1</sup> neurons) mediate metabolic responses of skeletal muscle  
60 to exercise, thereby contributing to metabolic benefits of exercise. However, the mechanisms by  
61 which VMHdm/c<sup>SF-1</sup> neurons mediate exercise-induced augmented skeletal muscle PGC-1α  
62 expression remains unclear. In particular, the pathway from VMHdm/c<sup>SF-1</sup> neurons to skeletal  
63 muscle has yet to be unraveled.

64 PGC-1α expression in skeletal muscle is augmented by a variety of physiological stimuli<sup>9,13</sup>.  
65 For example, *ex vivo* muscle contraction is sufficient to increase mRNA levels of *Pgc-1α* by  
66 activation of calcium signaling pathways<sup>14,15</sup>. Notably, the adrenergic activation such as  
67 epinephrine, norepinephrine, and β-2 adrenergic receptors (β2AdR) agonist can dramatically  
68 increase mRNA levels of *Pgc-1α* in skeletal muscle<sup>16,17</sup>. In contrast, blocking the adrenergic

69 signaling by a systematic injection of  $\beta$ 2AdR antagonist significantly hampers exercise-induced  
70 *Pgc-1 $\alpha$*  mRNA in skeletal muscle<sup>18</sup>. Numerous studies have indicated that VMH neurons affect  
71 the sympathetic nervous system (SNS) activity<sup>19,20</sup>. Knockdown of SF-1 in VMHdm/c neurons  
72 suppresses exercise-induced epinephrine release<sup>6</sup>. These data indicate that VMHdm/c<sup>SF-1</sup> neurons  
73 regulate skeletal muscle PGC-1 $\alpha$  via the SNS. However, the functional neurocircuits underlying  
74 VMHdm/c<sup>SF-1</sup> neuronal regulation of the SNS are still unclear. A genetic labeling study using *Sf-*  
75 *I-Cre* mice, which express Cre-recombinase in VMHdm/c in adults, portrays that VMHdm/c  
76 neurons highly innervate to several areas that regulate the SNS activity, including the anterior bed  
77 nucleus of the stria terminalis (aBNST), preoptic area (POA), anterior hypothalamus area (AH),  
78 paraventricular hypothalamic nucleus (PVH), and periaqueductal gray (PAG)<sup>21</sup>. Although studies  
79 using optogenetics have identified that distinct downstream sites of VMHdm/c<sup>SF-1</sup> neurons regulate  
80 blood glucose<sup>22</sup>, defensive behaviors<sup>23</sup>, and food intake<sup>24</sup>, the vital downstream node of  
81 VMHdm/c<sup>SF-1</sup> neurons regulating the SNS is unknown.

82 In this study, we used optogenetics and genetically-engineered mice to determine the key  
83 downstream nodes of VMHdm/c<sup>SF-1</sup> neurons that regulate skeletal muscle PGC-1 $\alpha$  via the SNS.  
84 We found that epinephrine release by the sympathoadrenal activity coupled with  $\beta$ 2AdR is  
85 essential for VMHdm/c<sup>SF-1</sup> neuronal-induced skeletal muscle PGC-1 $\alpha$ . Furthermore, our results  
86 demonstrated that VMHdm/c<sup>SF-1</sup> neurons regulate the SNS through functionally redundant circuits  
87 with the PVH and PAG acting as the main downstream nodes.

## 88 **Results**

89

### 90 **Optogenetic VMHdm/c<sup>SF-1</sup> neuronal activation induces skeletal muscle *Pgc-1α* mRNA** 91 **expression**

92 To determine the neuronal mechanism by which VMHdm/c<sup>SF-1</sup> neurons regulate skeletal  
93 muscle function via the SNS, we generated mice expressing channelrhodopsin 2(H134R)<sup>25</sup>(ChR2)  
94 specifically in VMHdm/c<sup>SF-1</sup> neurons by microinjection of adeno-associated virus (AAV) bearing  
95 Cre-dependent ChR2 fused with fluorescent reporters (AAV-DIO-ChR2) into *Sf-1* Cre mice<sup>26</sup>  
96 (VMHdm/c<sup>SF-1</sup>::ChR2, Figure 1A). We used AAV containing Cre-dependent mCherry for control  
97 (VMHdm/c<sup>SF-1</sup>::mCherry). We used the following stimulation configurations; 5 ms duration, 20  
98 Hz, 2 seconds activation/2 seconds resting cycle for 30 minutes (Figure 1B). We confirmed that  
99 our optogenetic configuration significantly induced Fos protein expression, a neuronal activation  
100 marker, in the stimulated side of the VMHdm/c, but not in the non-stimulated side (Figure 1C).  
101 Similar to previous studies<sup>22,27,28</sup>, VMHdm/c<sup>SF-1</sup> neuronal activation increased blood glucose  
102 (Figure 1D). In addition, we observed that VMHdm/c<sup>SF-1</sup> neuronal activation induced increases in  
103 plasma glucagon without changing plasma insulin levels (Figure 1E and F). Next, we determined  
104 whether VMHdm/c<sup>SF-1</sup> neuronal activation can induce transcriptional changes in skeletal muscle.  
105 PGC-1α is a key transcriptional regulator for a spectrum of genes governing glucose and fat  
106 metabolism, oxidative capacity, protein synthesis and degradation, and vascularization<sup>9,10,13</sup>.  
107 Importantly, *Pgc-1α* mRNA induction can be used as a readout of exercise-related skeletal muscle  
108 transcriptional changes because a single exercise training dramatically increases mRNA levels of  
109 *Pgc-1α*<sup>6,13</sup>. PGC-1α has several isoforms such as PGC1a-1, -2, -3 and -4<sup>29</sup>. We found that 30  
110 minutes of VMHdm/c<sup>SF-1</sup> neuronal activation is sufficient to induce *Pgc-1α-2*, -3, and -4 mRNA

111 levels in tibialis anterior (TA) skeletal muscle (Figure 1G). We then measured plasma  
112 catecholamines levels after VMHdm/c<sup>SF-1</sup> neuronal activation. Interestingly, plasma epinephrine  
113 levels were significantly increased by VMHdm/c<sup>SF-1</sup> neuronal activation, but norepinephrine levels  
114 in VMHdm/c<sup>SF-1</sup> neuronal activated mice were not significantly different from control group  
115 (Figure 1 H and I). Previous studies have shown that optogenetic VMHdm/c<sup>SF-1</sup> neuronal activation  
116 elicits behavioral changes such as freeze and burst activity (combination of freeze, jump, and  
117 run)<sup>23,30</sup>. In line with that, we found that VMHdm/c<sup>SF-1</sup> neuronal activation induced freeze or burst  
118 activity (17 cases of freeze (55%), 14 cases of burst activity (45%); total 31 trials). However, we  
119 did not observe any differences of skeletal muscle *Pgc-1 $\alpha$*  mRNA levels between mice showed  
120 freeze and burst activity (SFigure 1), suggesting that the burst activity is unlikely to contribute to  
121 VMHdm/c<sup>SF-1</sup> neurons-induced *Pgc-1 $\alpha$*  expression. Collectively, these data indicate that  
122 VMHdm/c<sup>SF-1</sup> neurons regulate skeletal muscle function via sympathoadrenal activity, as the  
123 adrenal gland is the only organ able to secrete epinephrine into circulation.

124

### 125 **The adrenal gland is essential for VMHdm/c<sup>SF-1</sup> neuronal regulation of skeletal muscle**

126 Next, to determine whether epinephrine release from the adrenal gland is required for  
127 VMHdm/c<sup>SF-1</sup> neurons-induced skeletal muscle *Pgc-1 $\alpha$* , we surgically removed the adrenal gland,  
128 and then stimulated VMHdm/c<sup>SF-1</sup> neurons. Sham surgery were used as surgical controls. As we  
129 expected, the adrenalectomy (ADX) eliminated blood corticosterone (Figure 2B). ADX mice were  
130 supplied with corticosterone in the drinking water to maintain the physiological levels of blood  
131 corticosterone (Figure 2C). We carried out optogenetic stimulation five days after ADX. ADX  
132 appeared not to affect Fos induction in the VMH (Figure 2D), suggesting ADX does not affect the  
133 ability of VMHdm/c<sup>SF-1</sup> neuronal activation. Indeed, plasma glucagon levels were significantly

134 higher in ADX mice after VMHdm/c<sup>SF-1</sup> neuronal activation (Figure 2E). Stunningly, ADX  
135 completely blocked the effects of VMHdm/c<sup>SF-1</sup> neuronal activation on blood glucose (Figure 2F),  
136 and skeletal muscle *Pgc-1α* expression (Figure 2G), suggesting that the sympathoadrenal drive,  
137 specifically the epinephrine release, is essential for VMHdm/c<sup>SF-1</sup> neuronal regulation of skeletal  
138 muscle function. In addition, these data suggest that glucagon release unlikely contributes to  
139 VMHdm/c<sup>SF-1</sup> neuronal-induced blood glucose levels.

140

### 141 **β2AdR is required for VMHdm/c<sup>SF-1</sup> neuronal-induced skeletal muscle *Pgc-1α***

142 We assessed the contribution of β2AdR in VMHdm/c<sup>SF-1</sup> neuronal-induced skeletal  
143 muscle *Pgc-1α* expression. β2AdR is the major form of adrenergic receptors in skeletal muscle<sup>31</sup>.  
144 β2AdR agonist injection increases skeletal muscle *Pgc-1α-2*, *-3*, and *-4* mRNA levels<sup>16</sup>, suggesting  
145 that the sympathetic input coupled with β2AdR is key for skeletal muscle physiology. We tested  
146 whether β2AdR global knockout (KO) can diminish VMHdm/c<sup>SF-1</sup> neuronal-induced skeletal  
147 muscle *Pgc-1α* expression (Figure 3A). We first determined whether β2AdR KO affects the ability  
148 of ChR2 to activate VMHdm/c<sup>SF-1</sup> neurons. Optogenetic stimulation induced equal levels of Fos  
149 expression in the VMH of wild-type and β2AdR KO mice (VMHdm/c<sup>SF-1</sup>::ChR2-WT and  
150 VMHdm/c<sup>SF-1</sup>::ChR2-β2AdR<sup>KO</sup>, Figure 3B), suggesting β2AdR KO does not affect the capacity  
151 for optogenetic activation of VMHdm/c<sup>SF-1</sup> neurons. Blood glucose and plasma glucagon in  
152 VMHdm/c<sup>SF-1</sup>::ChR2-β2AdR<sup>KO</sup> were significantly higher than that of control group (VMHdm/c<sup>SF-1</sup>  
153 ::mCherry-β2AdR<sup>KO</sup>) (Figure 3C and D). In addition, optogenetic stimulation of VMHdm/c<sup>SF-1</sup>  
154 neurons significantly increased plasma epinephrine in β2AdR KO compared to non-stimulation  
155 control (Figure 3E). VMHdm/c<sup>SF-1</sup>::ChR2-β2AdR<sup>KO</sup> showed significantly lower mRNA levels of  
156 skeletal muscle *Pgc-1α-2*, *-3*, and *-4* compared to VMHdm/c<sup>SF-1</sup>::ChR2-WT (Figure 3F).

157 Collectively, these results demonstrate that  $\beta 2\text{AdR}$  is essential for VMHdm/c<sup>SF-1</sup> neuronal-induced  
158 skeletal muscle transcriptional regulation, but not blood glucose levels.

159

### 160 **Redundant functionality of downstream nodes of VMHdm/c<sup>SF-1</sup> neurons**

161 VMHdm/c<sup>SF-1</sup> neurons project to a broad range of the CNS sites that regulate the SNS  
162 including presympathetic nodes<sup>21</sup>. Among these areas, we examined the contributions of the  
163 aBNST, POA, AH, PVH/AH, and PAG to VMHdm/c<sup>SF-1</sup> neuronal-induced augmentations in  
164 plasma epinephrine, and skeletal muscle *Pgc-1 $\alpha$*  expression. As the PVH and AH are located in  
165 close proximity to each other (the AH is located at ventral side of the PVH), thus the light source  
166 can reach to both areas based on the theoretical irradiance value calculation  
167 (<https://web.stanford.edu/group/dlab/cgi-bin/graph/chart.php>), it is possible that the PVH  
168 stimulation also affects the AH. Therefore, going forward, we will refer to optogenetic stimulation  
169 in this region as the PVH/AH stimulation instead of the PVH stimulation. We inserted the optic  
170 fiber probe into each area followed by an injection of AAV-DIO-ChR2 into the VMH of *Sf-1* Cre  
171 mice (Figure 4A). Intriguingly, all terminal stimulations of VMHdm/c<sup>SF-1</sup> neurons significantly  
172 increased blood glucose (Figure 4B). While stimulation in each area also increased plasma  
173 epinephrine (mean values  $\pm$  SEM ; 1919  $\pm$  324, 3869  $\pm$  922, 3782  $\pm$  594, 2759  $\pm$  188, 5145  $\pm$  841,  
174 and 6311  $\pm$  836 pg/mL for mCherry, aBNST, POA, AH, PVH/AH, and PAG, respectively), the  
175 most striking differences were observed after terminal stimulation of VMHdm/c<sup>SF-1</sup> neurons in the  
176 PVH/AH and PAG (Figure 4C). We found that *Pgc-1 $\alpha$*  total mRNA expression levels were  
177 significantly increased in the terminal stimulation of the POA and PVH/AH (Figure 4D). *Pgc-1 $\alpha$* -  
178 *1* mRNA expression levels were significantly increased in the terminal stimulation in the AH and  
179 PVH/AH (Figure 4E). *Pgc-1 $\alpha$* -2 and -3 mRNA expression levels were significantly increased in



180 the terminal stimulation in the PVH/AH and PAG (Figure 4G). Finally, *Pgc-1 $\alpha$ -4* mRNA  
181 expression levels were significantly increased in the terminal stimulation in the PVH/AH. Of note,  
182 although the terminal stimulation in the aBNST, POA, and AH did not statistically increase RNA  
183 levels of skeletal muscle *Pgc-1 $\alpha$ -2*, *-3*, and *-4*, the mean values were higher than those in the control  
184 group. Collectively, we conclude that VMHdm/c<sup>SF-1</sup> neuronal projections to the PVH/AH and PAG  
185 have greater contributions to the regulation of skeletal muscle *Pgc-1 $\alpha$*  mRNA expression and  
186 plasma epinephrine. However, other projection sites likely contribute as well, indicating that  
187 VMHdm/c<sup>SF-1</sup> neurons use neurocircuits that are functionally redundant to regulate the  
188 sympathoadrenal activity.

189 A previous study found that VMHdm/c<sup>SF-1</sup> neurons project to downstream sites  
190 collaterally<sup>23</sup>. For example, VMHdm/c<sup>SF-1</sup> neurons projecting to the PAG also send axons to the  
191 AH<sup>30</sup>. Each VMHdm/c<sup>SF-1</sup> neuron likely projects to multiple sites, especially to the areas are  
192 topographically adjacent, such as aBNST and POA or the AH and PVH. In other words, when the  
193 terminal activation of VMHdm/c<sup>SF-1</sup> neurons at one downstream area occurs, back-propagated  
194 neuronal activation could happen in other non-stimulated areas. To determine whether it is the  
195 case, we assessed Fos expression after the terminal activation of VMHdm/c<sup>SF-1</sup> neurons in the  
196 aBNST, POA, AH, PVH/AH, and PAG as well as the soma stimulation of VMHdm/c<sup>SF-1</sup> neurons  
197 (Figure 5A and B). We compared the stimulated side (right hemisphere) and the non-stimulated  
198 side (left hemisphere). As shown (Figure 1C), the optogenetic stimulation of the soma of  
199 VMHdm/c<sup>SF-1</sup> neurons (Figure 5O and P) significantly increased Fos expression in the stimulated  
200 side of the VMH (Figure 5Q). Intriguingly, the soma activation of VMHdm/c<sup>SF-1</sup> neurons  
201 significantly increased Fos expression only in the PVH and AH (Figure 5Q). We did not find distal  
202 neuronal propagations by the terminal activation in the POA, PVH/AH, AH, and PAG (Figure 5H,

203 K, N, Q, and T). The terminal stimulation in the aBNST increased Fos expression in distal site  
204 PAG (Figure 5E). However, it is unclear that Fos expression in the PAG was induced by the distal  
205 propagation as Fos expression in the VMH was not changed after aBNST stimulation (Figure 5E).  
206 We frequently observed Fos-expression in the sites proximal to the stimulated site. For instance,  
207 the aBNST stimulation induced Fos-expression in the POA (Figure 5E). Likewise, the AH  
208 stimulation induced Fos-expression in the PVH (Figure 5K), and the PVH/AH stimulation induced  
209 Fos-expression in the POA and VMH (Figure 5N). Fos expression in the stimulated hemisphere  
210 of AH was significantly higher of all the stimulation sites (Figure 5E, H, K, N, Q, and T),  
211 suggesting that these Fos-inductions in the AH may be the secondary rather than direct propagated  
212 activation. Collectively, Fos expression data indicated that each single VMHdm/c<sup>SF-1</sup> neuronal  
213 axon projects many downstream sites collaterally, strengthening the idea of functionally redundant  
214 VMHdm/c<sup>SF-1</sup> neuronal circuits that regulate the SNS.

## 215 Discussion

216 Here we demonstrate that VMHdm/c<sup>SF-1</sup> neuronal circuits regulate skeletal muscle *Pgc-1α* mRNA  
217 via the sympathoadrenal-released epinephrine coupled with β2AdR. Our data further predict that  
218 VMHdm/c<sup>SF-1</sup> neurons collaterally project multiple presympathetic nodes in the CNS that possess  
219 redundant functions to regulate the sympathoadrenal activation. The VMH facilitates glucose  
220 uptake in skeletal muscle and brown adipose tissue (BAT) and fatty acid mobilization from white  
221 adipose tissues (WAT) by direct sympathetic innervation rather than the sympathoadrenal drive<sup>32-</sup>  
222 <sup>36</sup>. Intriguingly, these studies have demonstrated that direct sympathetic innervation is key for  
223 VMH-induced glucose uptake and lipolysis in BAT and skeletal muscle rather than the  
224 sympathoadrenal activity<sup>32,33,35,36</sup>. Contrary to these previous findings, results in this study  
225 highlight the importance of the sympathoadrenal activity for VMHdm/c<sup>SF-1</sup> neurons-induced  
226 skeletal muscle *Pgc-1α* expression. Because VMH neurons are genetically heterogenous<sup>37,38</sup>, it is  
227 possible that VMHdm/c<sup>SF-1</sup> neurons regulate skeletal muscle function primarily via  
228 sympathoadrenal activity, while other subtypes of neurons in the VMH mediate skeletal muscle  
229 glucose uptake via the direct sympathetic innervation. Optogenetic activation of leptin receptors-  
230 expressing neurons in the VMHdm/c does not affect blood glucose, plasma glucagon, and plasma  
231 insulin levels<sup>22</sup>, supporting the notion that functional segregation may exist within the VMHdm/c  
232 neuronal subgroups. Further studies are warranted to reveal the mechanistic differences among the  
233 genetically distinctive neuronal groups within the VMHdm/c that regulate skeletal muscle function.

234 PGC-1α is one of the key molecules regulating a wide range of skeletal muscle  
235 physiology<sup>39</sup>. PGC-1α-1 is “classic” PGC-1α, and regulates mitochondrial function, glucose and  
236 fat metabolism<sup>14,29</sup>. PGC-1α-4 regulates the protein synthesis<sup>14,29</sup>. The physiological role of PGC-  
237 1α-2 and -3 are still not clear. It is predicted that they contribute to angiogenesis, epithelial function,

238 chromosomal maintenance, and cholesterol metabolism<sup>16</sup>. PGC-1 $\alpha$ -1 is derived from the proximal  
239 promoter region of PGC-1 $\alpha$  locus, and PGC-1 $\alpha$ -2, -3, and -4 are derived from the distal promoter  
240 region<sup>10</sup>. Intriguingly, running wheel activity and treadmill exercise activate the distal promoter  
241 region but not the proximal promoter region<sup>18,40</sup>. Furthermore,  $\beta$ 2AdR agonist also only initiates  
242 the transcription of PGC-1 $\alpha$  exclusively at the proximal promoter region<sup>18,40</sup>, leading to increased  
243 mRNA levels of PGC-1 $\alpha$ -2, -3, and -4, but not PGC-1 $\alpha$ -1<sup>16</sup>. These data indicate the importance of  
244 the CNS→the SNS→skeletal muscle  $\beta$ 2AdR axis for the regulation of skeletal muscle PGC-1 $\alpha$  in  
245 response to exercise. Our data demonstrate that VMHdm/c<sup>SF-1</sup> neurons can regulate PGC-1 $\alpha$ -2, -3,  
246 and -4, but not -1, further strengthening the idea that these neurons are important for exercise-  
247 induced augmentation of skeletal muscle function.

248 VMHdm/c<sup>SF-1</sup> neuronal activation increases circulating epinephrine, and ADX completely  
249 blocks VMHdm/c<sup>SF-1</sup> neuronal-induced skeletal muscle *Pgc-1 $\alpha$*  expression (Figure 2), suggesting  
250 that epinephrine secretion from the adrenal gland is essential for VMHdm/c<sup>SF-1</sup> neuronal regulation  
251 of skeletal muscle function. Because the adrenal gland secretes many endocrine hormones, we  
252 must consider the contribution of non-catecholamines hormones to VMHdm/c<sup>SF-1</sup> neuronal-  
253 induced skeletal muscle *Pgc-1 $\alpha$*  expression. For instance, optogenetic activation of VMHdm/c<sup>SF-1</sup>  
254 neurons increases blood corticosterone<sup>22</sup>. Thus, it is possible that the surge of corticosterone from  
255 the adrenal gland also contributes to VMHdm/c<sup>SF-1</sup> neuronal-induced skeletal muscle *Pgc-1 $\alpha$* .  
256 Corticosterone supplement (Figure 2B) can only provide physiologically stable corticosterone  
257 levels but can not imitate endogenous dynamics of corticosterone releases. However,  
258 dexamethasone (DEX) treatments suppress PGC-1 $\alpha$  in skeletal muscle cell lines<sup>41</sup>, and in the testis  
259 of *in vivo* mouse model<sup>42</sup>. Glucocorticoid receptors (GRs) are expressed in skeletal muscle, and  
260 skeletal muscle-specific GR-KO mice show increased lean mass<sup>43</sup>, which is in line with the fact

261 that DEX can induce atrophy<sup>44</sup>. Therefore, we conclude that corticosterone unlikely contributes to  
262 the induction of skeletal muscle PGC-1 $\alpha$  after VMHdm/c<sup>SF-1</sup> neuronal activation. However, further  
263 studies are necessary to determine that epinephrine is the only factor in the adrenal gland that  
264 contributes to VMHdm/c<sup>SF-1</sup> neuronal-induced skeletal muscle *Pgc-1 $\alpha$* .

265 A large body of literature has concluded that  $\beta$ 2AdR signaling is key to the regulation of  
266 skeletal muscle PGC-1 $\alpha$  expression<sup>31</sup>, and ultimately orchestrating protein synthesis/degradation,  
267 glucose and fat metabolism, and angiogenesis<sup>9,10,40</sup>. Our study extends these findings to show that  
268 the sympathoadrenal activity coupled with  $\beta$ 2AdR is essential for VMHdm/c<sup>SF-1</sup> neuronal-induced  
269 skeletal muscle *Pgc-1 $\alpha$*  expression (Figure 3).  $\beta$ 2AdR is expressed throughout the body<sup>18</sup>, and even  
270 within the skeletal muscle,  $\beta$ 2AdR is expressed in a variety of cell types including skeletal muscle  
271 cells, smooth muscle cells (blood vessels), and endothelial cells<sup>31,45</sup>. In addition, recent studies  
272 highlight the key role of  $\beta$ 2AdR at the neuromuscular junctions (NMJs) to regulate acetylcholine  
273 and acetylcholine receptors<sup>46,47</sup>. As we used global  $\beta$ 2 AdR KO mice, we can not formally exclude  
274 the possibility that  $\beta$ 2AdR in the non-skeletal muscle organs are actually essential. Further studies  
275 using tissue specific  $\beta$ 2AdR manipulation (e.g., deletion of  $\beta$ 2AdR in specifically skeletal or  
276 smooth muscle cells) are necessary to decipher the precise targets of VMHdm/c<sup>SF-1</sup> neurons and  
277 the sympathoadrenal axis.

278 The terminal activation of VMHdm/c<sup>SF-1</sup> neurons in the PVH/AH and PAG significantly  
279 increases blood epinephrine and skeletal muscle *Pgc-1 $\alpha$ -2 and -3* mRNA (Figure 4). Because the  
280 PVH and PAG directly project to the sympathoadrenal preganglionic neurons in the  
281 intermediolateral nucleus of the spinal cord<sup>48-51</sup>, it is predicted that activation of these areas can  
282 have more profound effects on the sympathoadrenal activity. By comparing the results of the  
283 PVH/AH and AH stimulation (Figure 4), it is likely that VMHdm/c<sup>SF-1</sup> neurons projecting to the

284 PVH substantially contribute to the regulation of the SNS activity than that to the AH. Because  
285 ADX completely diminishes augmented blood glucose by VMHdm/c<sup>SF-1</sup> neuronal stimulation  
286 (Figure 2), epinephrine release by the SNS activation is likely required for the augmented blood  
287 glucose levels. Interestingly, the terminal activation in all sites we investigated significantly  
288 increased blood glucose (Figure 4). Taken together, blood glucose data (Figure 4) indicate that all  
289 sites we investigated can activate the sympathoadrenal activity, although the degree of the  
290 sympathoadrenal activation may vary. In fact, the mean value of blood epinephrine, skeletal  
291 muscle *Pgc-1* mRNA levels in all the sites are higher than control group (Figure 4), suggesting  
292 that all sites we investigated contribute to VMHdm/c<sup>SF-1</sup>-neuronal regulation of the  
293 sympathoadrenal activity at some extent of degree. Collectively, these data suggest that the  
294 downstream sites of VMHdm/c<sup>SF-1</sup> neurons have redundant functions regarding the augmented  
295 sympathoadrenal activity.

296 The Fos expression data (Figure 5) indicate that VMHdm/c<sup>SF-1</sup> neuronal axon projections  
297 are collaterals rather than one-to-one projections<sup>52</sup> as terminal stimulations can induce back-  
298 propagated activation in the proximal projected sites of VMHdm/c<sup>SF-1</sup> neuronal (Figure 5). A  
299 previous study using the retrograde tracing method supports this notion as they found that most of  
300 VMHdm/c<sup>SF-1</sup> neurons project to the AH also collaterally send the axon to the PAG<sup>23</sup>. The VMH  
301 regulate essential physiological function for survival and high-energy demand situations including  
302 counterregulatory actions to hypoglycemia<sup>3</sup>, defensive behavior<sup>23,30</sup>, and exercise<sup>5,53</sup>. These  
303 survival functions have to be executed coordinately at the whole-body level. Considering that  
304 collateral VMHdm/c<sup>SF-1</sup> neuronal circuits are functionally redundant, we propose that similar to  
305 monoaminergic neurons<sup>54</sup>, VMHdm/c<sup>SF-1</sup> neurons play a “broadcast” role in the regulation of  
306 physiological functions at the whole-body level during emergency or high-energy demand

307 situations. Further studies will be necessary to delineate the degree of contributions of each  
308 VMHdm/c<sup>SF-1</sup> neuronal downstream node to the regulation of metabolism.

309

### 310 **Limitation of this study**

311 As many previous studies have noted, optogenetic stimulation induces firing patterns that  
312 are dissimilar to endogenous firing patterns in many neurons<sup>55</sup>. Therefore, we can not exclude the  
313 possibility that our data demonstrate the maximum capability of VMHdm/c<sup>SF-1</sup> neurons on the  
314 regulation of skeletal muscle rather physiological roles of VMHdm/c<sup>SF-1</sup> neurons. We also used a  
315 fixed optogenetic configuration throughout the terminal activations, despite the fact that each site  
316 we investigated has a different density of VMHdm/c<sup>SF-1</sup> neuronal axon and terminals<sup>21</sup>. It is  
317 virtually possible that different terminal sites require different firing pattern to execute their  
318 function properly. Future studies to use fine-tuning configuration are necessary to test this  
319 possibility.

320 As we mentioned above, the inherent limitations of the ADX studies have to be considered.  
321 Although we supplied the corticosterone to maintain its physiological levels, the surgical removal  
322 of the adrenal gland can compromise many physiological functions directly and indirectly. For  
323 instance, we observed that the basal levels of skeletal muscle *Pgc-1 $\alpha$*  were decreased in ADX mice  
324 (56%, 51%, 96%, 95%, and 72% mean reductions in *Pgc-1 $\alpha$  total*, *Pgc-1 $\alpha$ -1*, *Pgc-1 $\alpha$ -2*, *Pgc-1 $\alpha$ -3*,  
325 *and Pgc-1 $\alpha$ -4* respectively compared to sham control, in Figure 2G). To exclude the possibility  
326 that ADX affects the sensitivity of adrenergic receptors, we investigated whether  $\beta$ 2AdR agonist  
327 can induce skeletal muscle *Pgc-1 $\alpha$*  in ADX mice.  $\beta$ 2AdR agonist significantly induced skeletal  
328 muscle *Pgc-1 $\alpha$* , and there were no significant differences between sham and ADX mice (SFigure  
329 2). Thus, ADX unlikely affects the sensitivity of adrenergic receptors in skeletal muscle in our

330 experimental design. Nonetheless, we have to interpret ADX studies with careful consideration,  
331 and future experiments using sophisticated techniques (e.g., genetic-ablation of epinephrine only  
332 from the adrenal medulla) will be warranted to further confirm the role of epinephrine releases  
333 from the adrenal medulla in the regulation of skeletal muscle physiology.

334

### 335 **Conclusion**

336 The CNS-skeletal muscle interactions are important to maintain metabolic homeostasis.  
337 The skeletal muscle plays a critical role in the regulation of metabolic homeostasis as it  
338 substantially contributes to basal energy expenditure and glucose disposal after meal<sup>13,56</sup>. A large  
339 body of studies have built the foundation of neuroanatomy regarding metabolic homeostasis<sup>51</sup>. In  
340 the last decade, optogenetic tools have revealed detailed functional neurocircuits regulating  
341 metabolism including food intake and glucose metabolism<sup>1,57,58</sup>. This study using optogenetics  
342 demonstrates that VMHdm/c<sup>SF-1</sup> neurons regulate skeletal muscle PGC1- $\alpha$  via epinephrine  
343 released from the adrenal gland coupled with  $\beta$ 2AdR. In addition, our data suggest that  
344 VMHdm/c<sup>SF-1</sup> neuronal circuits regulating the sympathoadrenal activity are functionally redundant,  
345 yet varied contributions from each downstream node to the regulation of the SNS likely exist  
346 (SFigure 3). Our study advances the understanding of brain-skeletal muscle communications and  
347 implies the significant contributions of VMHdm/c<sup>SF-1</sup> neurons→sympathoadrenal axis to  
348 beneficial effects of exercise on skeletal muscle.



## 349 **Experimental Procedure**

350

### 351 **Genetically-Engineered Mice**

352 *Sf-1*-Cre mice were obtained from the Jackson Laboratory (US; Catalog# 012462). *Abrb2* KO mice  
353 were derived from  $\beta$ -null mice<sup>59</sup>, which was kindly provided by Dr. Bradford Lowell (Harvard  
354 Medical School). The sequences of genotyping primers are followings; for *Sf-1*-Cre,  
355 aggaagcagccctggaac, aggcaaatttgggtgacgg, agaaactgctccgctttcc with expected bands sizes of 627  
356 bp for internal control and 236 bp for *Sf-1*-Cre; for *Abrb2* KO, cactgagactagtgagacgtg,  
357 accaagaataaggcccgagt, ccgggaatagacaaagacca with expected bands sizes of 225 bp for the wild-  
358 type allele and 410 bp for the knockout allele. *Sf-1*-Cre and *Abrb2* KO mice were bred to generate  
359 *Sf-1*-Cre::*Abrb2*<sup>KO/KO</sup> and *Sf-1*-Cre::*Abrb2*<sup>WT/WT</sup> mice. *Sf-1*-Cre mice were on a C57BL/J6  
360 background and other mice are on a mixed background (C57BL/J6 and FVB.129). We used 3-6  
361 month-old male mice whose body weights were above approximately 25-30 grams. All mice were  
362 fed a normal chow diet. Animal care was according to established NIH guidelines, and all  
363 procedures were approved by the Institutional Animal Care and Use Committee of the University  
364 of Texas Southwestern Medical Center and University of Texas Health San Antonio.

365

### 366 **AAV injections and optic fiber probe insertions**

367 Recombinant AAVs were purchased from the Vector Core at the University of North Carolina at  
368 Chapel Hill, US. rAAV5-EF1 $\alpha$ -DIO-mCherry ( $3.3 \times 10^{12}$  VM/mL), rAAV5-EF1 $\alpha$ -DIO-  
369 ChR2(H134R)-mCherry ( $3.4 \times 10^{12}$  VM/mL), and rAAV5-EF1 $\alpha$ -DIO-ChR2(H134R)-EGFP ( $3.2$   
370  $\times 10^{12}$  VM/mL) were unilaterally administered into the right side of the VMH of mice using a  
371 UMP3 UltraMicroPump (WPI, US) with 10  $\mu$ L NanoFil microsyringe (WPI) and 35G NanoFil

372 beveled needle (WPI; Catalog# NF35BV-2). The volume of AAVs was 1000 nL at the rate 100  
373 nL per minute, and the needle was left for another 5 minutes after the injection was finished. The  
374 face of beveled needle was placed towards the center of the brain. The coordinates of VMH-  
375 microinjection were AP; -1.4 L +0.5, and D -5.5 (from Bregma). The optic fiber probe was  
376 inserted as following coordinates; the VMH (AP; -1.4, L +0.5, and D -5.0), aBNST (AP; 0.3, L  
377 +0.5, and D -3.75), POA (AP; 0.4, L +0.25, and D -4.5), AH (AP; -0.9, L +0.5, and D -4.75),  
378 PVH/AH (AP; -0.8, L +0.25, and D -4.5), and PAG (AP; -4.3, L +0.2, and D -2.0). The  
379 configuration of the probe for the VMH stimulation was 400  $\mu\text{m}$  Core, 0.5NA,  $\text{\O}2.5$  mm ceramic  
380 ferrule, and 6mm length (RWD Life science Inc, US and Doric Lenses, Canada). The configuration  
381 of probe for other sites was 200  $\mu\text{m}$  Core diameter, 0.39NA,  $\text{\O}2.5$  mm Ceramic Ferrule diameter,  
382 and with varied length varied (3-5 mm depend on the place) (RWD Life science Inc, US and Doric  
383 Lenses, Canada). The fiber probe was secured by adhesion bond (Loctite 454, Loctite Inc, US).  
384 Mice were allowed to recover for at least three weeks after the AAV injections to fully express  
385 recombinant proteins.

386

### 387 **Optogenetics**

388 The light emitting diode (LED) driver (Thorlabs, US; DC4104) with fiber-coupled LED (Thorlabs;  
389 Catalog# M470F3) was used for the VMH stimulation, and the laser unit (Opto engine LLC, US;  
390 Catalog# MDL-III-470) was used for the terminal of VMHdm/c<sup>SF-1</sup> neuronal stimulations. The  
391 power of tips was set to  $\sim 1$  mW/mm<sup>2</sup> for the VMH stimulation and  $\sim 10$  mW/mm<sup>2</sup> for the terminal  
392 stimulations. The customized transistor-transistor logic generator was built based on the design by  
393 the University of Colorado Optogenetics and Neural Engineering Core. Rotary joint patch cable  
394 (Thorlabs; Catalog# RJPSF4 for LED and RJPFF4 for the laser) was used to connect either fiber-

395 coupled LED or the laser unit. The quick-release interconnect (Thorlabs; Catalog# ADAF2) was  
396 used to connect the rotary joint patch cable to the fiber probe attached to mouse head. The  
397 stimulation was set to; 5 ms duration, 20 Hz, 2 seconds activation and 2 seconds rest cycle, 30  
398 minutes (Figure 1B).

399

#### 400 **Adrenalectomy**

401 Skin and muscle incisions (approximately 1 cm) were made close to the abdominal area where  
402 kidney was located. Both the adrenal glands were removed by tying with sterile suture. The sham  
403 operation was performed as same as ADX surgery except for removing the adrenal glands. The  
404 corticosterone water (75 µg/mL, vehicle was sterile 1% ethanol/0.9% NaCl water) was provided  
405 with ADX mice, and vehicle was provided with sham mice.

406

#### 407 **Immunohistochemistry and Fos counting**

408 Mouse brains were prepared as previously described<sup>60,61</sup>. Anti-cFos (Sigma, US; Catalog# F7799,  
409 batch #0000102540) and secondary fluorescent antibodies (Thermofisher Inc, US; Catalog# A-  
410 21202 and A-21203, Lot#WF320931 and WD319534, respectively) were used. Dilution rates for  
411 antibodies were 1:1000 for first antibody and 1:200 for second antibodies. Images were captured  
412 by fluorescence microscopies (Keyence US, US; Model: BZ-X710, Leica Inc, US; Model DM6  
413 B). Exposure of captured images was adjusted, and each area (aBNST, POA, AH, PVH, VMH,  
414 and PAG) was clipped by Photoshop. Clipped images were exported to Fiji, and the number of  
415 cells expressing Fos was counted by particle measurement function (Figure 5B).

416

#### 417 **Assessment of glucose, catecholamines, and hormone levels in the blood**

418 Blood glucose was measured by a glucose meter as previously described<sup>6,61,62</sup>. Plasma  
419 catecholamines and hormones levels were measured as previously described<sup>6,61</sup>. Briefly, the  
420 plasma catecholamines were analyzed by the Vanderbilt Hormone Assay & Analytical Services  
421 Core. Plasma Glucagon (Merckodia Inc, US; Catalog#10-1281-01), insulin (Crystal Chem Inc, US;  
422 Catalog# 90080), and corticosterone (Cayman Chemical, US; Catalog #501320) levels were  
423 determined by commercially available ELISA kits.

424

#### 425 **Assessment of mRNA**

426 mRNA levels in the TA muscle were determined as previously described<sup>63</sup>. The sequences of the  
427 deoxy-oligonucleotides primers are: *Pparg1a* total (5' tgatgtgaatgacttgatacagaca, and 5'  
428 gctcattgtgtactggttgatg), *Pparg1a-1* (5' ggacatgtgcagccaagactct, and 5'  
429 cacttcaatccaccagaaagct), *Pparg1a-2* (5' ccaccagaatgagtacatgga, and 5' gttcagcaagatctgggcaaa),  
430 *Pparg1a-3* (5' aagtgagtaaccggaggcattc, and 5' tcaggaagatctgggcaaa), *Pparg1a-4* (5'  
431 tcacaccaaaccacagaaa, and 5' ctggaagatatggcacat), and *18S* (5' catgcagaaccacagacagta and 5'  
432 cctcagcagcttgtgtcta).

433

#### 434 **Data analysis and statistical design**

435 The data are represented as means  $\pm$  S.E.M. GraphPad PRISM version 9 (GraphPad, US) was used  
436 for the statistical analyses and  $P < 0.05$  was considered as a statistically significant difference. A  
437 detailed analysis was described in Supplemental Table 1. The sample size was decided based on  
438 previous publications<sup>6,60-67</sup>, and no power analysis was used. Experiments were replicated in  
439 Figure 1, 2, 3, and Figure 4B. We did not carry out replicate experiments for data shown in Figure

440 4C-H and 5. Figures were generated by PRISM version 9, Illustrator 2021, and Photoshop 2021  
441 (Adobe Inc, US).

442

#### 443 **Acknowledgement**

444 We thank Glenn Toney at UT Health San Antonio (UTHSA) for valuable advice, Nancy Gonzalez  
445 and Harun A. Khan (UTHSA) for the technical assistant, Juri C. Fujikawa for providing  
446 illustrations, and Steven Wyler, Ryan Reynolds, Luis Leon Mercado, Syann Lee, and Joel. K.  
447 Elmquist (UTSW) for valuable comments on the manuscript. This work was supported by the  
448 University of Texas System (UT Rising STARS to T.F.), and San Antonio Area Foundation (to  
449 T.F.)

450

#### 451 **Competing interests**

452 The authors do not have any conflict of interests.

453

#### 454 **Contribution**

455 T.Y. designed, performed and analyzed experiments, and edited the manuscript. S.F., A.H., Z.S.,  
456 J.L., A.S.T., and A.K.S., performed experiments. T.F. designed, performed, supervised, and  
457 analyzed experiments, and wrote and finalized the manuscript.

458 **Figure Legends**

459 **Figure 1. Optogenetic activation of VMHdm/c<sup>SF-1</sup> neurons increases mRNA levels of skeletal**  
460 **muscle *Pgc1-α*** (A) Schematic figure of targeting site of VMHdm/c<sup>SF-1</sup> neurons. (B) Experimental  
461 design and stimulus setting of optogenetics. (C) Representative figures of Fos expression pattern  
462 in the hypothalamus of mice expressing ChR2 in SF-1 expression neurons in VMHdm/c  
463 (VMHdm/c<sup>SF-1</sup>::ChR2) after VMHdm/c<sup>SF-1</sup> neurons stimulation. (D) Blood glucose, (E) plasma  
464 glucagon, (F) plasma insulin in mice after VMHdm/c<sup>SF-1</sup> neuronal stimulation. Control group is  
465 composed of mice expressing mCherry in VMHdm/c<sup>SF-1</sup> neurons (VMHdm/c<sup>SF-1</sup>::mCherry) (G)  
466 mRNA expression levels of *Pgc1-α* isoform in skeletal muscle of VMHdm/c<sup>SF-1</sup>::ChR2 mice after  
467 optogenetic stimulation. (H) Plasma norepinephrine and (I) epinephrine in VMHdm/c<sup>SF-1</sup>::ChR2  
468 mice after optogenetic stimulation. Values are mean ± S.E.M. \*\*\* p < 0.001, \* p < 0.05.

469  
470 **Figure 2. Adrenalectomy (ADX) completely blocks VMHdm/c<sup>SF-1</sup> neurons-induced blood**  
471 **glucose and skeletal muscle *Pgc1-α* expression** (A) Schematic of ADX experimental design. (B)  
472 Blood corticosterone levels before and after ADX in mice. (C) Blood corticosterone levels in ADX  
473 mice with and without corticosterone supplementation. (D) Representative figures of Fos  
474 expression pattern in the hypothalamus of ADX mice expressing ChR2 in SF-1 expression neurons  
475 in VMHdm/c (VMHdm/c<sup>SF-1</sup>::ChR2-ADX) and the number of Fos positive cells in the VMH of  
476 VMHdm/c<sup>SF-1</sup>::ChR2-ADX and sham VMHdm/c<sup>SF-1</sup>::ChR2 (VMHdm/c<sup>SF-1</sup>::ChR2-sham). (E)  
477 Blood glucose, (F) plasma glucagon, and (G) mRNA expression levels of *Pgc1-α* isoform in  
478 skeletal muscle of VMHdm/c<sup>SF-1</sup>::ChR2-ADX after optogenetic stimulation. Values are mean ±  
479 S.E.M. \*\*\*\* p < 0.0001, \*\*\* p < 0.001, \*\* p < 0.01, \* p < 0.05.

480

481 **Figure 3. Ablation of  $\beta$ 2AdR hampers VMHdm/c<sup>SF-1</sup> neurons-induced skeletal muscle *Pgcl-***  
482  **$\alpha$**  (A) Schematic of experimental design. (B) Representative figures of Fos expression pattern in  
483 the hypothalamus of VMHdm/c<sup>SF-1</sup>::ChR2 mice lacking  $\beta$ 2AdR (VMHdm/c<sup>SF-1</sup>::ChR2-  $\beta$ 2AdR<sup>KO</sup>),  
484 and the number of Fos positive cells in the VMH of VMHdm/c<sup>SF-1</sup>::ChR2-  $\beta$ 2AdR<sup>KO</sup> and wild-  
485 type control (WT) (VMHdm/c<sup>SF-1</sup>::ChR2-WT). (C) Blood glucose and (D) plasma glucagon levels  
486 in VMHdm/c<sup>SF-1</sup>::ChR2- $\beta$ 2AdR<sup>KO</sup> mice after optogenetic stimulation. (E) Plasma epinephrine  
487 levels in VMHdm/c<sup>SF-1</sup>::ChR2- $\beta$ 2AdR<sup>KO</sup> mice with and without optogenetic stimulation. (F)  
488 mRNA expression levels of *Pgcl- $\alpha$*  isoform in skeletal muscle of ChR2-  $\beta$ 2AdR<sup>KO</sup> mice after  
489 optogenetic stimulation. Values are mean  $\pm$  S.E.M. \*\*\*\* p < 0.0001, \*\* p < 0.01, \* p < 0.05.

490

491 **Figure 4. Downstream nodes of VMHdm/c<sup>SF-1</sup> neurons are functionally redundant to**  
492 **regulate the sympathoadrenal activity.** (A) Schematic figure of experimental design. (B) Blood  
493 glucose levels in VMHdm/c<sup>SF-1</sup>::ChR2 mice before and after the terminal stimulation of the  
494 anterior bed nucleus of the stria terminalis (aBNST), preoptic area (POA), anterior hypothalamus  
495 area (AH), paraventricular hypothalamic nucleus (PVH) and AH, and periaqueductal gray (PAG).  
496 Control group is VMHdm/c<sup>SF-1</sup>::mCherry mice after the VMH stimulation. (C) Plasma epinephrine  
497 levels in VMHdm/c<sup>SF-1</sup>::ChR2 mice after the terminal stimulation of aBNST, POA, AH, PVH/AH,  
498 and PAG. (D) mRNA expression levels of *Pgcl- $\alpha$ -Total*, (E) *Pgcl- $\alpha$ -1*, (F) *Pgcl- $\alpha$ -2*, (G) *Pgcl-*  
499  *$\alpha$ -3*, and (H) *Pgcl- $\alpha$ -4*, skeletal muscle of VMHdm/c<sup>SF-1</sup>::ChR2 mice after the terminal stimulation  
500 of aBNST, POA, AH, PVH/AH, and PAG. Values are mean  $\pm$  S.E.M. \*\*\*\* p < 0.0001, \*\*\* p <  
501 0.001, \*\* p < 0.01, \* p < 0.05.

502

503 **Figure 5. The terminal activation of VMHdm/c<sup>SF-1</sup> neurons evokes Fos expression in the**  
504 **proximal terminal sites. (A)** Schematic figure of experimental design. **(B)** Schematic of Fos  
505 expression counts in the nucleus. The brain maps of optic fiber insertion sites of **(C)**, aBNST, **(F)**  
506 POA **(I)**, AH **(L)**, PVH/AH, **(O)**, VMH, and **(R)** PAG. Representative figures of Fos expression  
507 at the terminal sites or soma of VMHdm/c<sup>SF-1</sup> neurons; **(D)** aBNST, **(G)** POA, **(J)** AH, **(M)**  
508 PVH/AH, **(P)**, VMHdm/c, and **(S)** PAG. The number of Fos expression cells at the aBNST, POA,  
509 AH, PVH/AH, and PAG of VMHdm/c<sup>SF-1</sup>::Chr2 mice after the terminal stimulation of **(E)**  
510 aBNST, **(H)** POA, **(K)** AH, **(N)** PVH/AH, **(Q)** VMHdm/c and **(T)** PAG. Values are mean ± S.E.M.  
511 \*\*\*\* p < 0.0001, \*\*\* p < 0.001, \*\* p < 0.01, \* p < 0.05.

512  
513 **Supplemental Figure 1, related to Figure 1.** mRNA expression levels of *Pgc1-α* isoform in  
514 skeletal muscle of VMHdm/c<sup>SF-1</sup>::Chr2 mice exhibiting freeze or burst behavior after optogenetic  
515 stimulation. The stimulation configuration was the same as described in Figure 1. Values are mean  
516 ± S.E.M., \*\*\* p < 0.001, \* p < 0.05.

517  
518 **Supplemental Figure 2, related to Figure 2.** mRNA expression levels of *Pgc1-α* isoform in  
519 skeletal muscle of ADX mice after β2AdR agonist (clenbuterol 1 mg per kg bodyweight, dissolved  
520 in sterile saline solution). Values are mean ± S.E.M. \*\*\* p < 0.001, \*\* p < 0.01, \* p < 0.05.

521  
522 **Supplemental Figure 3. Summary figure depicting pathways by which VMHdm/c<sup>SF-1</sup>**  
523 **neurons regulate skeletal muscle *Pgc1-α* expression and blood glucose levels via the**  
524 **sympathoadrenal gland.**



## 525 References

- 526 1 Gautron, L., Elmquist, J. K. & Williams, K. W. Neural control of energy balance:  
527 translating circuits to therapies. *Cell* **161**, 133-145, doi:10.1016/j.cell.2015.02.023 (2015).
- 528 2 Morton, G. J., Meek, T. H. & Schwartz, M. W. Neurobiology of food intake in health and  
529 disease. *Nat Rev Neurosci* **15**, 367-378, doi:10.1038/nrn3745 (2014).
- 530 3 Stanley, S., Moheet, A. & Seaquist, E. R. Central Mechanisms of Glucose Sensing and  
531 Counterregulation in Defense of Hypoglycemia. *Endocr Rev* **40**, 768-788,  
532 doi:10.1210/er.2018-00226 (2019).
- 533 4 Zhang, Z., Boelen, A., Kalsbeek, A. & Fliers, E. TRH Neurons and Thyroid Hormone  
534 Coordinate the Hypothalamic Response to Cold. *Eur Thyroid J* **7**, 279-288,  
535 doi:10.1159/000493976 (2018).
- 536 5 Fujikawa, T., Castorena, C. M., Lee, S. & Elmquist, J. K. The hypothalamic regulation of  
537 metabolic adaptations to exercise. *J Neuroendocrinol* **29**, doi:10.1111/jne.12533 (2017).
- 538 6 Fujikawa, T. *et al.* SF-1 expression in the hypothalamus is required for beneficial metabolic  
539 effects of exercise. *Elife* **5**, doi:10.7554/eLife.18206 (2016).
- 540 7 Zhao, L. *et al.* Steroidogenic factor 1 (SF1) is essential for pituitary gonadotrope function.  
541 *Development* **128**, 147-154 (2001).
- 542 8 Parker, K. L. *et al.* Steroidogenic factor 1: an essential mediator of endocrine development.  
543 *Recent Prog Horm Res* **57**, 19-36 (2002).
- 544 9 Handschin, C. & Spiegelman, B. M. The role of exercise and PGC1alpha in inflammation  
545 and chronic disease. *Nature* **454**, 463-469, doi:10.1038/nature07206 (2008).
- 546 10 Ruas, J. L. *et al.* A PGC-1alpha isoform induced by resistance training regulates skeletal  
547 muscle hypertrophy. *Cell* **151**, 1319-1331, doi:10.1016/j.cell.2012.10.050 (2012).
- 548 11 Handschin, C. *et al.* Abnormal glucose homeostasis in skeletal muscle-specific PGC-  
549 1alpha knockout mice reveals skeletal muscle-pancreatic beta cell crosstalk. *J Clin Invest*  
550 **117**, 3463-3474, doi:10.1172/JCI31785 (2007).
- 551 12 Benton, C. R. *et al.* Modest PGC-1alpha overexpression in muscle in vivo is sufficient to  
552 increase insulin sensitivity and palmitate oxidation in subsarcolemmal, not  
553 intermyofibrillar, mitochondria. *J Biol Chem* **283**, 4228-4240,  
554 doi:10.1074/jbc.M704332200 (2008).
- 555 13 Hawley, J. A., Hargreaves, M., Joyner, M. J. & Zierath, J. R. Integrative biology of exercise.  
556 *Cell* **159**, 738-749, doi:10.1016/j.cell.2014.10.029 (2014).
- 557 14 Kang, C. & Li Ji, L. Role of PGC-1alpha signaling in skeletal muscle health and disease.  
558 *Ann N Y Acad Sci* **1271**, 110-117, doi:10.1111/j.1749-6632.2012.06738.x (2012).
- 559 15 Barres, R. *et al.* Acute exercise remodels promoter methylation in human skeletal muscle.  
560 *Cell Metab* **15**, 405-411, doi:10.1016/j.cmet.2012.01.001 (2012).
- 561 16 Martinez-Redondo, V. *et al.* Peroxisome Proliferator-activated Receptor gamma  
562 Coactivator-1 alpha Isoforms Selectively Regulate Multiple Splicing Events on Target  
563 Genes. *J Biol Chem* **291**, 15169-15184, doi:10.1074/jbc.M115.705822 (2016).
- 564 17 Miura, S. *et al.* An increase in murine skeletal muscle peroxisome proliferator-activated  
565 receptor-gamma coactivator-1alpha (PGC-1alpha) mRNA in response to exercise is  
566 mediated by beta-adrenergic receptor activation. *Endocrinology* **148**, 3441-3448,  
567 doi:10.1210/en.2006-1646 (2007).
- 568 18 Miura, S., Kai, Y., Kamei, Y. & Ezaki, O. Isoform-specific increases in murine skeletal  
569 muscle peroxisome proliferator-activated receptor-gamma coactivator-1alpha (PGC-

- 570 1alpha) mRNA in response to beta2-adrenergic receptor activation and exercise.  
571 *Endocrinology* **149**, 4527-4533, doi:10.1210/en.2008-0466 (2008).
- 572 19 Uyama, N., Geerts, A. & Reynaert, H. Neural connections between the hypothalamus and  
573 the liver. *Anat Rec A Discov Mol Cell Evol Biol* **280**, 808-820 (2004).
- 574 20 Shimazu, T. & Minokoshi, Y. Systemic Glucoregulation by Glucose-Sensing Neurons in  
575 the Ventromedial Hypothalamic Nucleus (VMH). *J Endocr Soc* **1**, 449-459,  
576 doi:10.1210/js.2016-1104 (2017).
- 577 21 Lindberg, D., Chen, P. & Li, C. Conditional viral tracing reveals that steroidogenic factor  
578 1-positive neurons of the dorsomedial subdivision of the ventromedial hypothalamus  
579 project to autonomic centers of the hypothalamus and hindbrain. *J Comp Neurol* **521**, 3167-  
580 3190, doi:10.1002/cne.23338 (2013).
- 581 22 Meek, T. H. *et al.* Functional identification of a neurocircuit regulating blood glucose. *Proc*  
582 *Natl Acad Sci U S A*, doi:10.1073/pnas.1521160113 (2016).
- 583 23 Wang, L., Chen, I. Z. & Lin, D. Collateral pathways from the ventromedial hypothalamus  
584 mediate defensive behaviors. *Neuron* **85**, 1344-1358, doi:10.1016/j.neuron.2014.12.025  
585 (2015).
- 586 24 Zhang, J., Chen, D., Sweeney, P. & Yang, Y. An excitatory ventromedial hypothalamus to  
587 paraventricular thalamus circuit that suppresses food intake. *Nat Commun* **11**, 6326,  
588 doi:10.1038/s41467-020-20093-4 (2020).
- 589 25 Berndt, A. *et al.* High-efficiency channelrhodopsins for fast neuronal stimulation at low  
590 light levels. *Proc Natl Acad Sci U S A* **108**, 7595-7600, doi:10.1073/pnas.1017210108  
591 (2011).
- 592 26 Dhillon, H. *et al.* Leptin directly activates SF1 neurons in the VMH, and this action by  
593 leptin is required for normal body-weight homeostasis. *Neuron* **49**, 191-203 (2006).
- 594 27 Shimazu, T., Fukuda, A. & Ban, T. Reciprocal influences of the ventromedial and lateral  
595 hypothalamic nuclei on blood glucose level and liver glycogen content. *Nature* **210**, 1178-  
596 1179 (1966).
- 597 28 Flak, J. N. *et al.* Ventromedial hypothalamic nucleus neuronal subset regulates blood  
598 glucose independently of insulin. *J Clin Invest* **130**, 2943-2952, doi:10.1172/JCI134135  
599 (2020).
- 600 29 Martinez-Redondo, V., Pettersson, A. T. & Ruas, J. L. The hitchhiker's guide to PGC-  
601 1alpha isoform structure and biological functions. *Diabetologia* **58**, 1969-1977,  
602 doi:10.1007/s00125-015-3671-z (2015).
- 603 30 Kunwar, P. S. *et al.* Ventromedial hypothalamic neurons control a defensive emotion state.  
604 *Elife* **4**, doi:10.7554/eLife.06633 (2015).
- 605 31 Lynch, G. S. & Ryall, J. G. Role of beta-adrenoceptor signaling in skeletal muscle:  
606 implications for muscle wasting and disease. *Physiol Rev* **88**, 729-767,  
607 doi:10.1152/physrev.00028.2007 (2008).
- 608 32 Takahashi, A. & Shimazu, T. Hypothalamic regulation of lipid metabolism in the rat: effect  
609 of hypothalamic stimulation on lipolysis. *Journal of the autonomic nervous system* **4**, 195-  
610 205 (1981).
- 611 33 Minokoshi, Y., Saito, M. & Shimazu, T. Sympathetic denervation impairs responses of  
612 brown adipose tissue to VMH stimulation. *Am J Physiol* **251**, R1005-1008 (1986).
- 613 34 Sudo, M., Minokoshi, Y. & Shimazu, T. Ventromedial hypothalamic stimulation enhances  
614 peripheral glucose uptake in anesthetized rats. *The American journal of physiology* **261**,  
615 E298-303 (1991).

- 616 35 Haque, M. S. *et al.* Role of the sympathetic nervous system and insulin in enhancing  
617 glucose uptake in peripheral tissues after intrahypothalamic injection of leptin in rats.  
618 *Diabetes* **48**, 1706-1712 (1999).
- 619 36 Minokoshi, Y., Haque, M. S. & Shimazu, T. Microinjection of leptin into the ventromedial  
620 hypothalamus increases glucose uptake in peripheral tissues in rats. *Diabetes* **48**, 287-291  
621 (1999).
- 622 37 Affinati, A. H. *et al.* Cross-species analysis defines the conservation of anatomically  
623 segregated VMH neuron populations. *Elife* **10**, doi:10.7554/eLife.69065 (2021).
- 624 38 van Veen, J. E. *et al.* Hypothalamic estrogen receptor alpha establishes a sexually  
625 dimorphic regulatory node of energy expenditure. *Nat Metab* **2**, 351-363,  
626 doi:10.1038/s42255-020-0189-6 (2020).
- 627 39 Lira, V. A., Benton, C. R., Yan, Z. & Bonen, A. PGC-1alpha regulation by exercise training  
628 and its influences on muscle function and insulin sensitivity. *Am J Physiol Endocrinol*  
629 *Metab* **299**, E145-161, doi:10.1152/ajpendo.00755.2009 (2010).
- 630 40 Chinsomboon, J. *et al.* The transcriptional coactivator PGC-1alpha mediates exercise-  
631 induced angiogenesis in skeletal muscle. *Proc Natl Acad Sci U S A* **106**, 21401-21406,  
632 doi:10.1073/pnas.0909131106 (2009).
- 633 41 Rahnert, J. A., Zheng, B., Hudson, M. B., Woodworth-Hobbs, M. E. & Price, S. R.  
634 Glucocorticoids Alter CRTC-CREB Signaling in Muscle Cells: Impact on PGC-1alpha  
635 Expression and Atrophy Markers. *PLoS One* **11**, e0159181,  
636 doi:10.1371/journal.pone.0159181 (2016).
- 637 42 Annie, L., Gurusubramanian, G. & Kumar Roy, V. Dexamethasone mediated  
638 downregulation of PGC-1alpha and visfatin regulates testosterone synthesis and  
639 antioxidant system in mouse testis. *Acta Histochem* **121**, 182-188,  
640 doi:10.1016/j.acthis.2018.12.004 (2019).
- 641 43 Shimizu, N. *et al.* A muscle-liver-fat signalling axis is essential for central control of  
642 adaptive adipose remodelling. *Nat Commun* **6**, 6693, doi:10.1038/ncomms7693 (2015).
- 643 44 Pereira, R. M. & Freire de Carvalho, J. Glucocorticoid-induced myopathy. *Joint Bone*  
644 *Spine* **78**, 41-44, doi:10.1016/j.jbspin.2010.02.025 (2011).
- 645 45 Conti, V. *et al.* Adrenoreceptors and nitric oxide in the cardiovascular system. *Front*  
646 *Physiol* **4**, 321, doi:10.3389/fphys.2013.00321 (2013).
- 647 46 Khan, M. M. *et al.* Sympathetic innervation controls homeostasis of neuromuscular  
648 junctions in health and disease. *Proc Natl Acad Sci U S A* **113**, 746-750,  
649 doi:10.1073/pnas.1524272113 (2016).
- 650 47 Rodrigues, A. C. Z. *et al.* The sympathetic nervous system regulates skeletal muscle motor  
651 innervation and acetylcholine receptor stability. *Acta Physiol (Oxf)* **225**, e13195,  
652 doi:10.1111/apha.13195 (2019).
- 653 48 Strack, A. M., Sawyer, W. B., Platt, K. B. & Loewy, A. D. CNS cell groups regulating the  
654 sympathetic outflow to adrenal gland as revealed by transneuronal cell body labeling with  
655 pseudorabies virus. *Brain Res* **491**, 274-296, doi:10.1016/0006-8993(89)90063-2 (1989).
- 656 49 Jansen, A. S., Nguyen, X. V., Karpitskiy, V., Mettenleiter, T. C. & Loewy, A. D. Central  
657 command neurons of the sympathetic nervous system: basis of the fight-or-flight response.  
658 *Science* **270**, 644-646, doi:10.1126/science.270.5236.644 (1995).
- 659 50 Saper, C. B., Loewy, A. D., Swanson, L. W. & Cowan, W. M. Direct hypothalamo-  
660 autonomic connections. *Brain Res* **117**, 305-312, doi:10.1016/0006-8993(76)90738-1  
661 (1976).

- 662 51 Saper, C. B. & Stornetta, R. L. The Rat Nervous System, 4th Edition, Chapter 23. *Academic*  
663 *Press*, 629-673, doi:<https://doi.org/10.1016/C2009-0-02419-2> (2015).
- 664 52 Betley, J. N., Cao, Z. F., Ritola, K. D. & Sternson, S. M. Parallel, redundant circuit  
665 organization for homeostatic control of feeding behavior. *Cell* **155**, 1337-1350,  
666 doi:10.1016/j.cell.2013.11.002 (2013).
- 667 53 Cavalcanti-de-Albuquerque, J. P. & Donato, J., Jr. Rolling out physical exercise and energy  
668 homeostasis: Focus on hypothalamic circuitries. *Front Neuroendocrinol* **63**, 100944,  
669 doi:10.1016/j.yfrne.2021.100944 (2021).
- 670 54 Scammell, T. E., Arrigoni, E. & Lipton, J. O. Neural Circuitry of Wakefulness and Sleep.  
671 *Neuron* **93**, 747-765, doi:10.1016/j.neuron.2017.01.014 (2017).
- 672 55 Guru, A., Post, R. J., Ho, Y. Y. & Warden, M. R. Making Sense of Optogenetics. *Int J*  
673 *Neuropsychopharmacol* **18**, pyv079, doi:10.1093/ijnp/pyv079 (2015).
- 674 56 Egan, B. & Zierath, J. R. Exercise metabolism and the molecular regulation of skeletal  
675 muscle adaptation. *Cell Metab* **17**, 162-184, doi:10.1016/j.cmet.2012.12.012 (2013).
- 676 57 Sternson, S. M., Atasoy, D., Betley, J. N., Henry, F. E. & Xu, S. An Emerging Technology  
677 Framework for the Neurobiology of Appetite. *Cell Metab* **23**, 234-253,  
678 doi:10.1016/j.cmet.2015.12.002 (2016).
- 679 58 Zimmerman, C. A. & Knight, Z. A. Layers of signals that regulate appetite. *Curr Opin*  
680 *Neurobiol* **64**, 79-88, doi:10.1016/j.conb.2020.03.007 (2020).
- 681 59 Bachman, E. S. *et al.* betaAR signaling required for diet-induced thermogenesis and  
682 obesity resistance. *Science* **297**, 843-845, doi:10.1126/science.1073160 (2002).
- 683 60 Fujikawa, T. *et al.* Leptin engages a hypothalamic neurocircuitry to permit survival in the  
684 absence of insulin. *Cell Metab* **18**, 431-444, doi:10.1016/j.cmet.2013.08.004 (2013).
- 685 61 Singha, A. *et al.* Leptin Receptors in RIP-Cre(25Mgn) Neurons Mediate Anti-dyslipidemia  
686 Effects of Leptin in Insulin-Deficient Mice. *Front Endocrinol (Lausanne)* **11**, 588447,  
687 doi:10.3389/fendo.2020.588447 (2020).
- 688 62 Singha, A. K. *et al.* Glucose-Lowering by Leptin in the Absence of Insulin Does Not Fully  
689 Rely on the Central Melanocortin System in Male Mice. *Endocrinology* **160**, 651-663,  
690 doi:10.1210/en.2018-00907 (2019).
- 691 63 Fujikawa, T., Chuang, J. C., Sakata, I., Ramadori, G. & Coppari, R. Leptin therapy  
692 improves insulin-deficient type 1 diabetes by CNS-dependent mechanisms in mice. *Proc*  
693 *Natl Acad Sci U S A* **107**, 17391-17396, doi:10.1073/pnas.1008025107 (2010).
- 694 64 Miyaki, T. *et al.* Noradrenergic projections to the ventromedial hypothalamus regulate fat  
695 metabolism during endurance exercise. *Neuroscience* **190**, 239-250,  
696 doi:10.1016/j.neuroscience.2011.05.051 (2011).
- 697 65 Asterholm, I. W. *et al.* Elevated resistin levels induce central leptin resistance and increased  
698 atherosclerotic progression in mice. *Diabetologia* **57**, 1209-1218, doi:10.1007/s00125-  
699 014-3210-3 (2014).
- 700 66 Williams, K. W. *et al.* Xbp1s in Pomc Neurons Connects ER Stress with Energy Balance  
701 and Glucose Homeostasis. *Cell Metab* **20**, 471-482, doi:10.1016/j.cmet.2014.06.002  
702 (2014).
- 703 67 Castorena, C. M. *et al.* CB1Rs in VMH neurons regulate glucose homeostasis but not body  
704 weight. *Am J Physiol Endocrinol Metab* **321**, E146-E155,  
705 doi:10.1152/ajpendo.00044.2021 (2021).
- 706

Figure 1

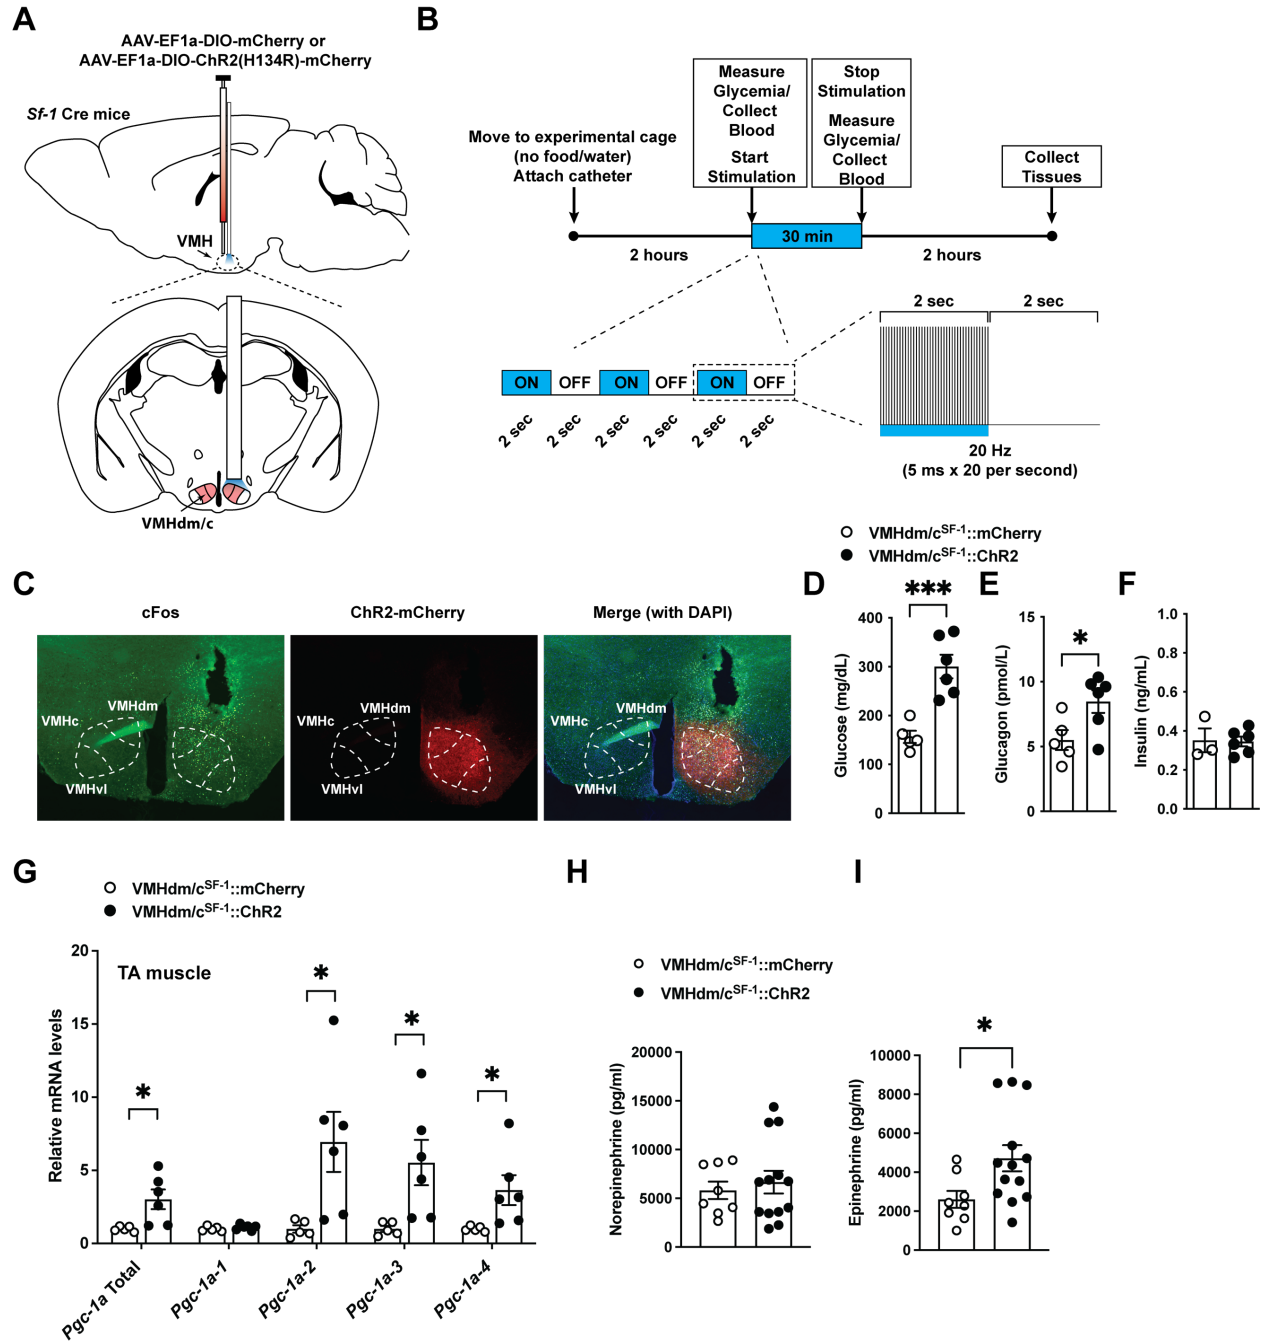

Figure 2

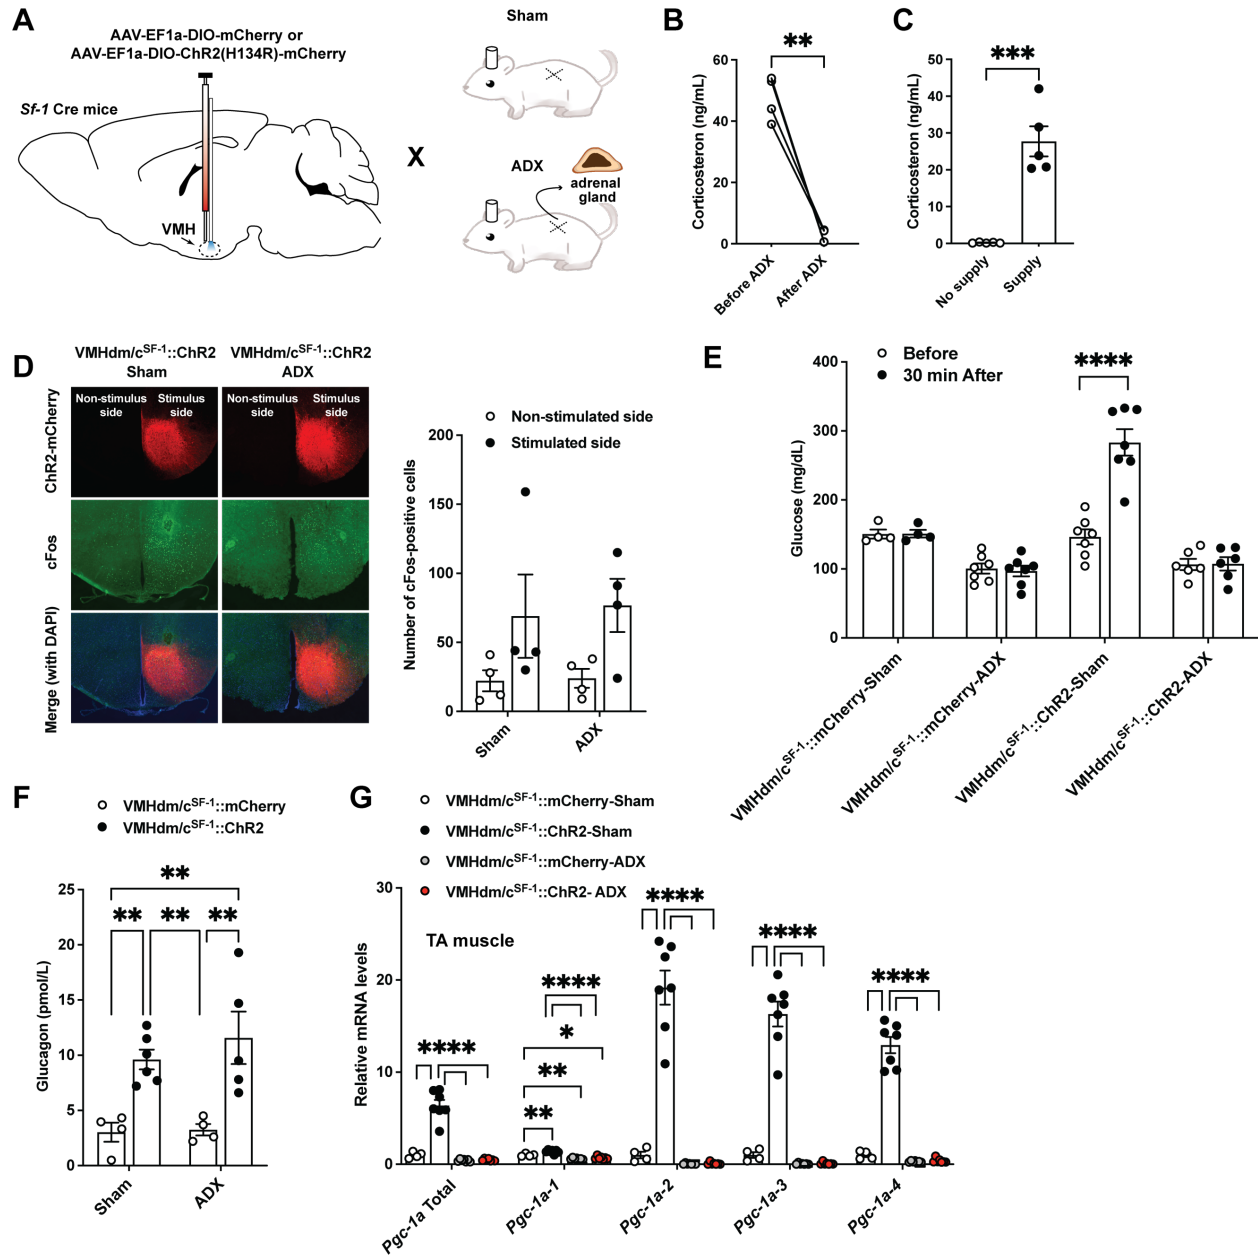

Figure 3

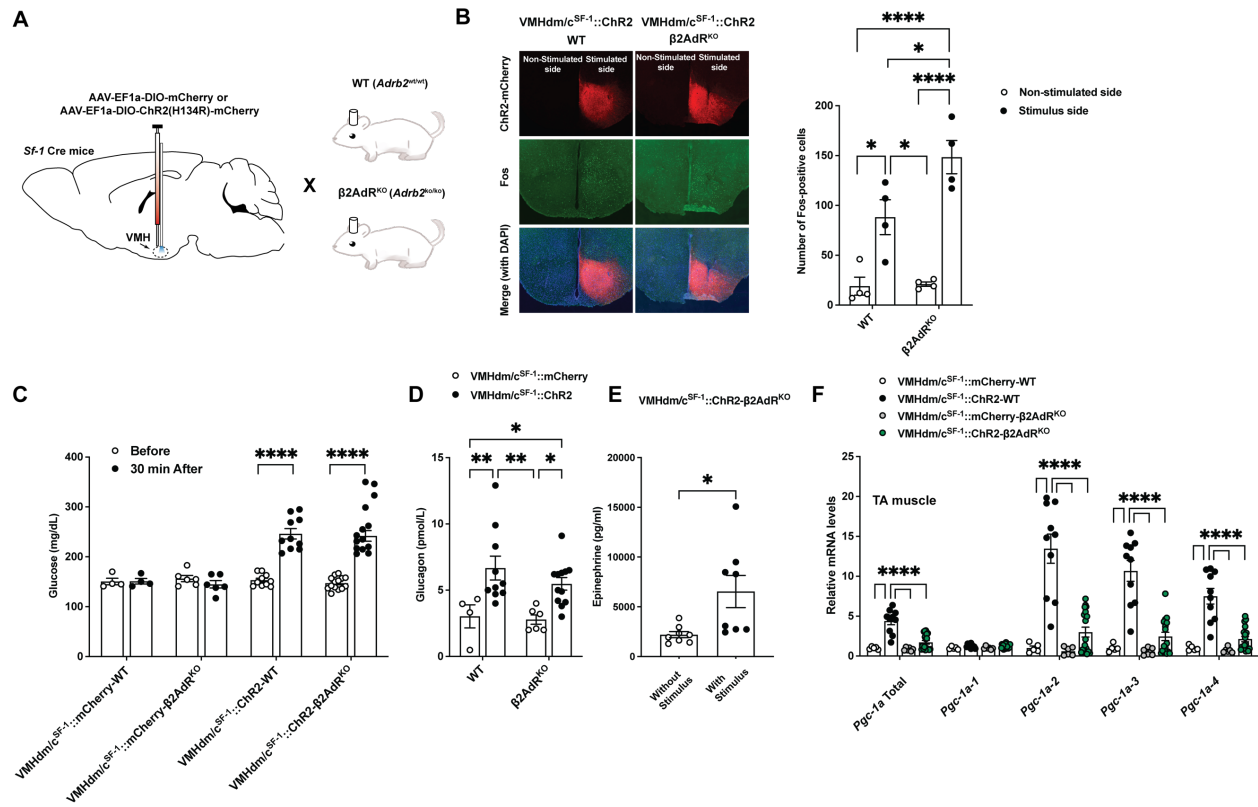

Figure 4

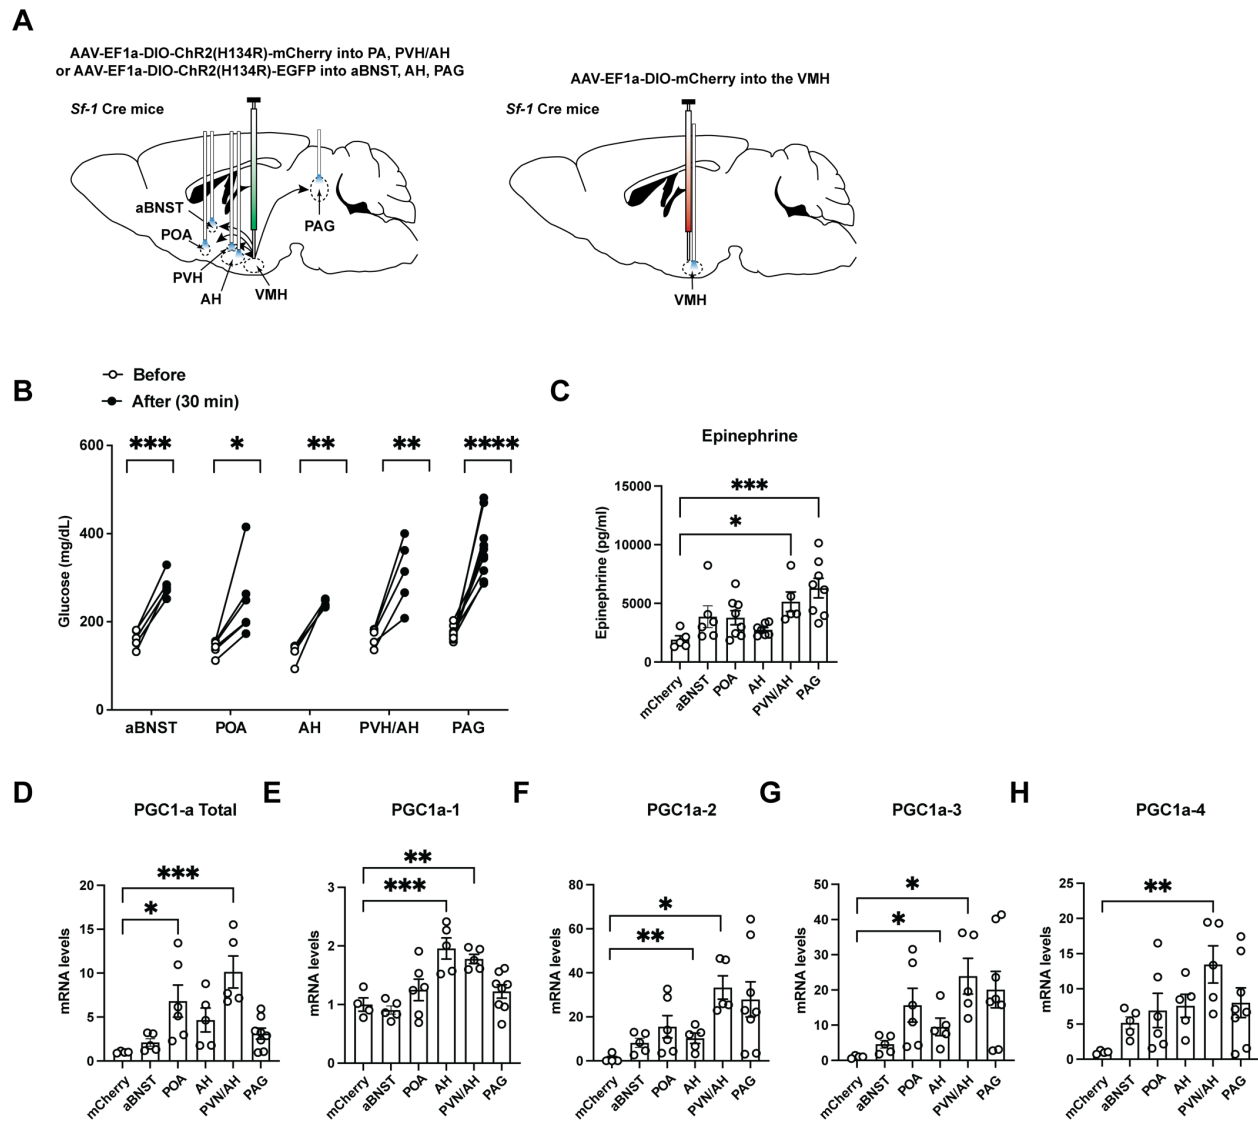



## Figure 5

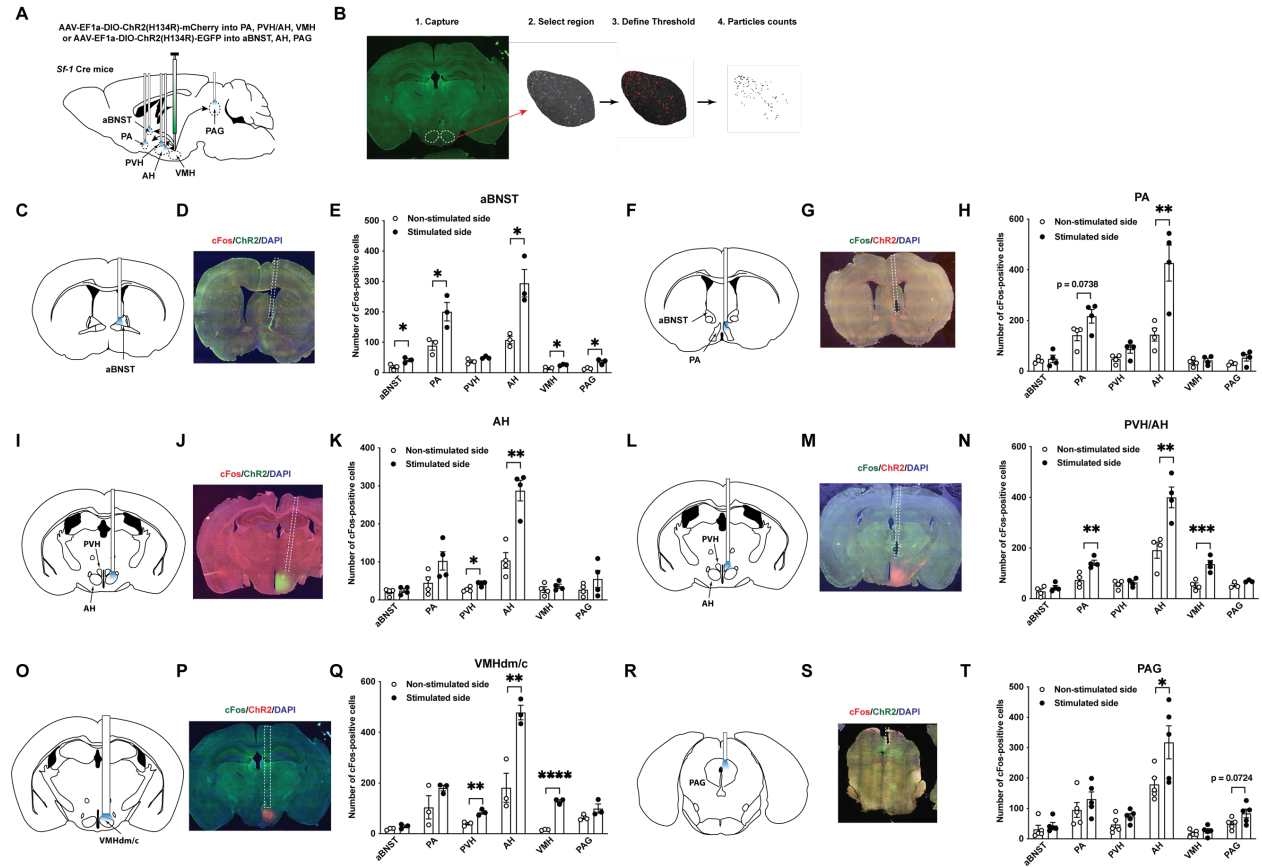

SFigure 1

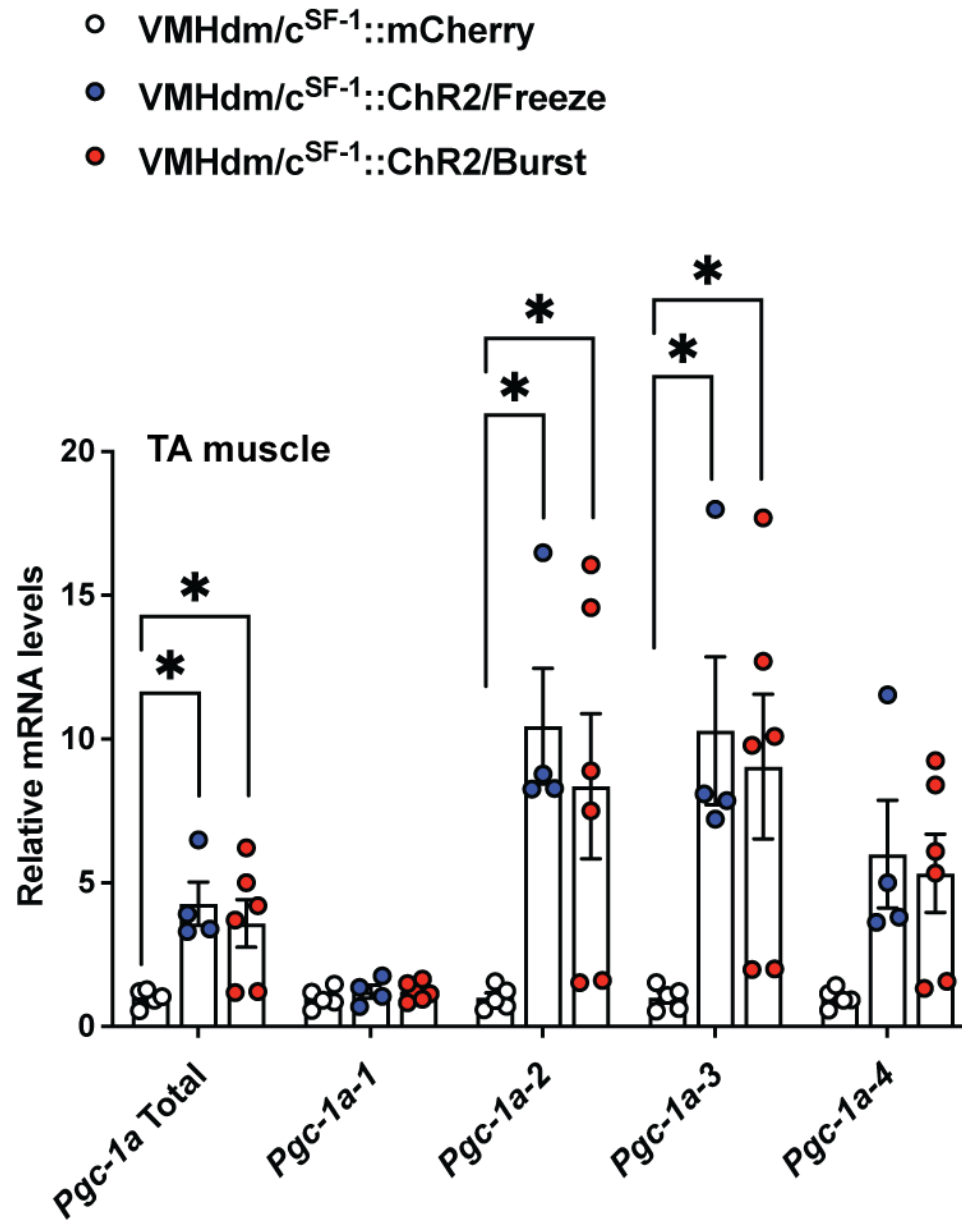

S Figure 2

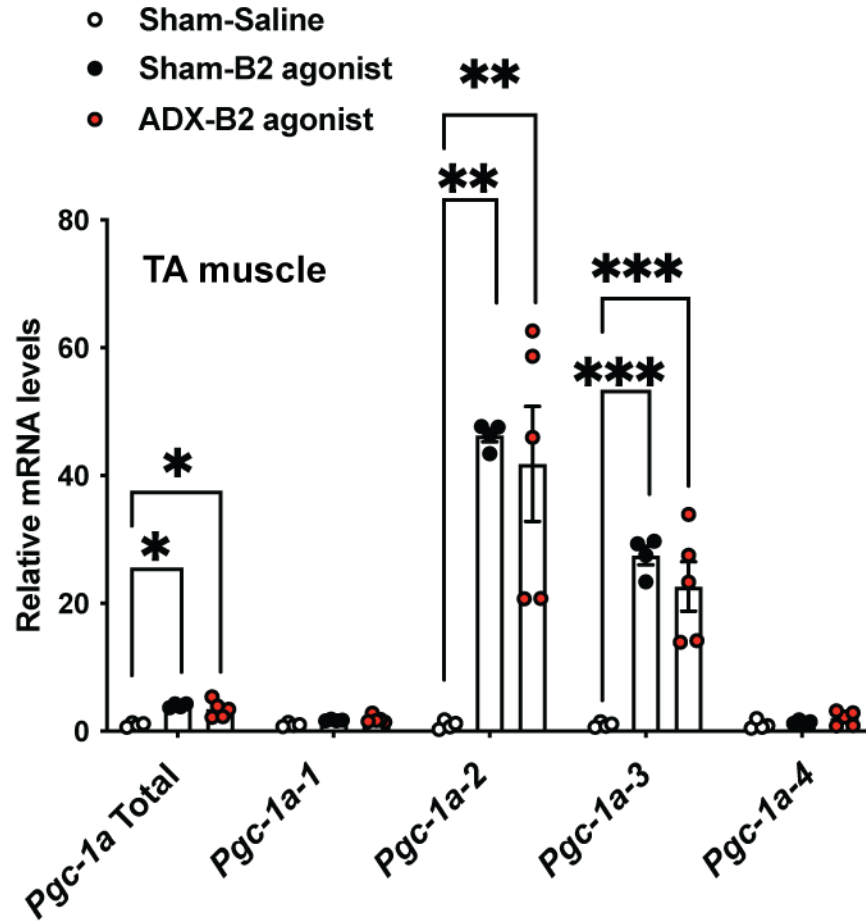

S Figure 3

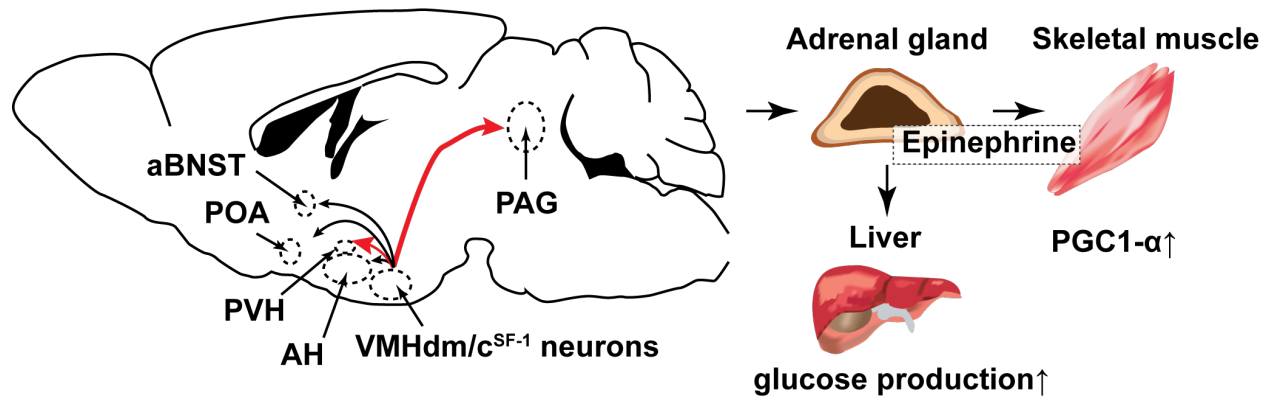

Source: http://biorxiv.org/content/10.1101/2022.04.01.486756v1.full.pdf
